# Supplementary material
Source: PubMed Central journal article supplement (PMC395895)

**A**

IR (Gy):    -    1    2    5    10

$\alpha$ -CREB

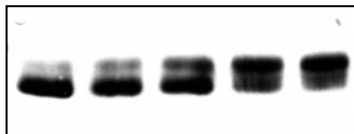**B**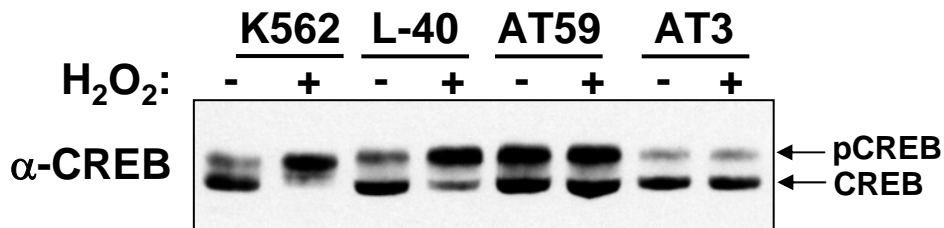**C**

caffeine:    -    -    +    -    +

H<sub>2</sub>O<sub>2</sub>:       -    +    +    -    -

IR:            -    -    -    +    +

$\alpha$ -CREB

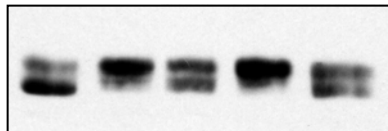

Supplement: pnas_101_16_5898__1.pdf [file pnas_101_16_5898__1.pdf]

**HA-ATM:**

**- WT KI**

**$\alpha$ -HA**

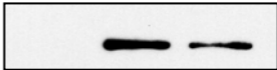

**$^{32}$ P-HIS-CREB**

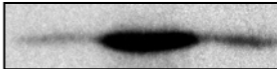

**$\alpha$ -HIS**

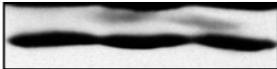

Supplement: pnas_101_16_5898__2.pdf [file pnas_101_16_5898__2.pdf]

**A**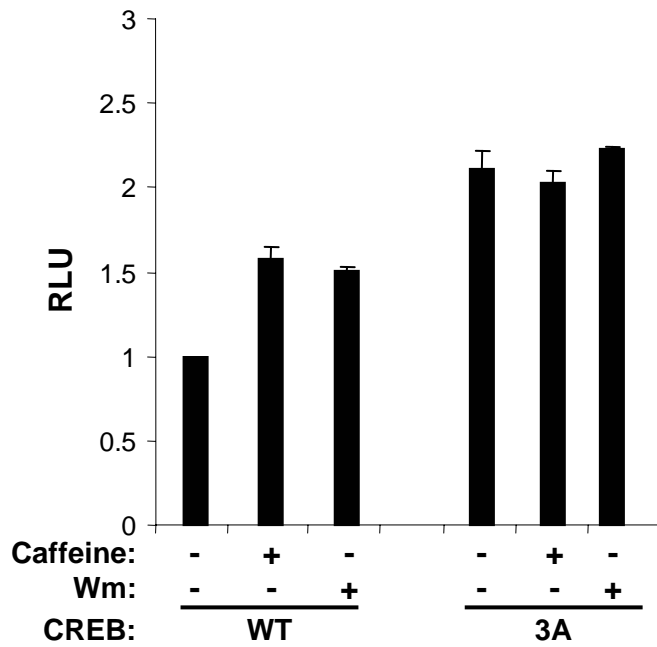**B**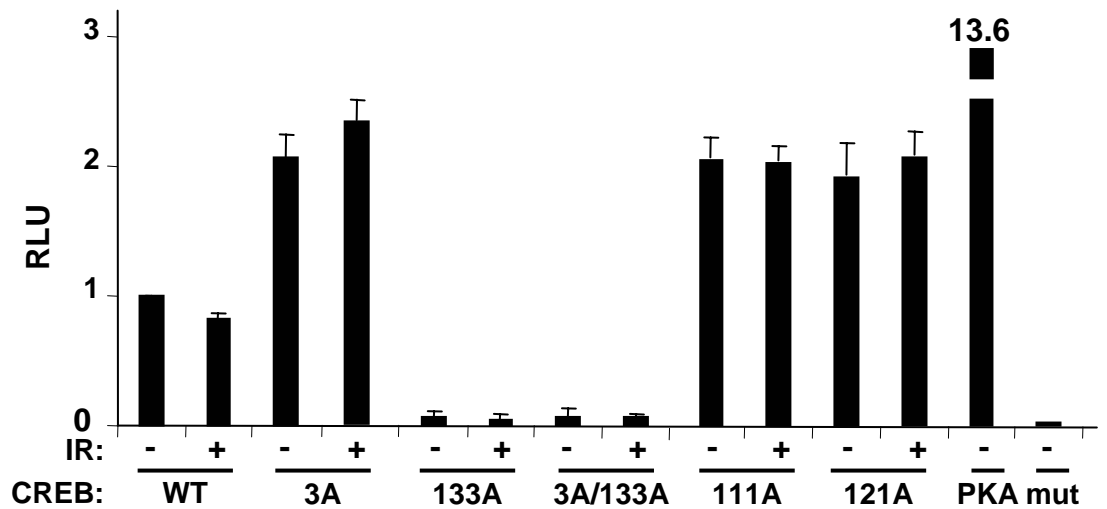

Supplement: pnas_101_16_5898__3.pdf [file pnas_101_16_5898__3.pdf]

**A**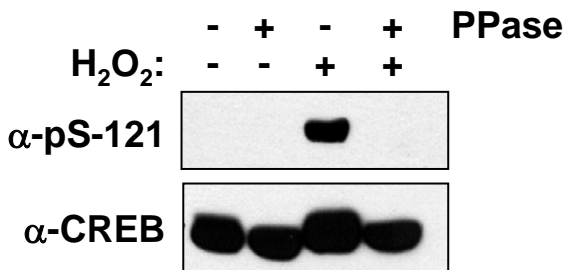**B**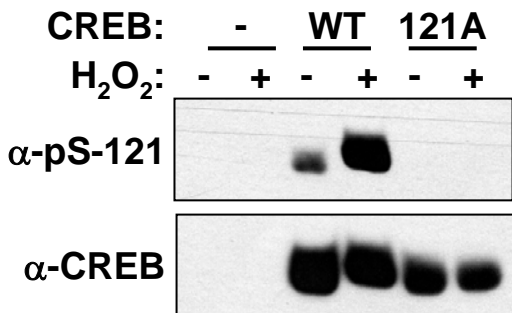

Supplement: pnas_101_16_5898__4.pdf [file pnas_101_16_5898__4.pdf]

**A**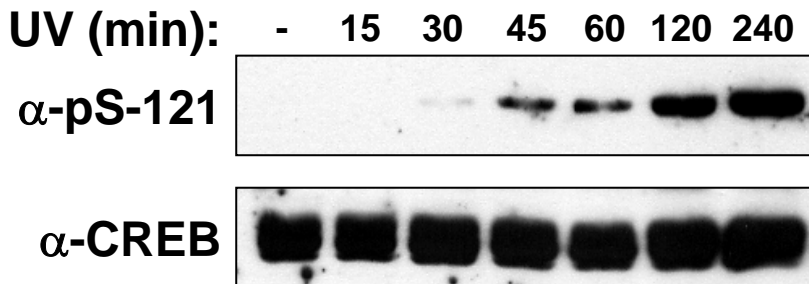**B**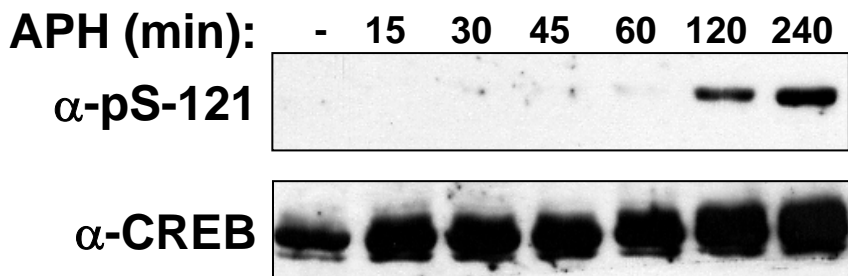**C**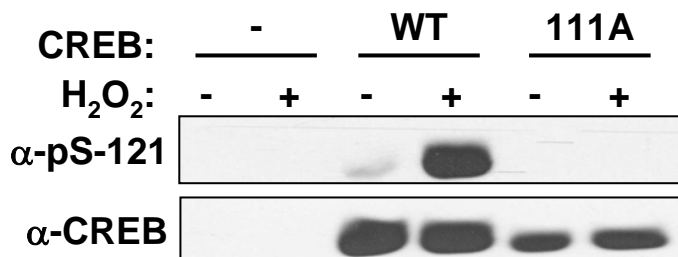

Supplement: pnas_101_16_5898__5.pdf [file pnas_101_16_5898__5.pdf]
